# Supplementary material for: Artery and vein size is balanced by Notch and ephrin B2/EphB4 during angiogenesis
Source: Oxford University Press journal article supplement (doi:10.1242/dev.022475), 2008-10-24
Supplement: dev022475-sup-022475-tables1.pdf [file dev022475-sup-022475-tables1.pdf]

**Table S1. No *Tie2-tTA;TRE-int3* mutants were born**

| Genotype                 | Number* (%) |
|--------------------------|-------------|
| Wild type                | 26 (29.9)   |
| <i>Tie2-tTA</i>          | 37 (42.5)   |
| <i>TRE-int3</i>          | 24 (27.6)   |
| <i>Tie2-tTA;TRE-int3</i> | 0 (0)       |

\*A total of 87 newborn pups from 13 litters were analyzed.

Of 87 pups from 13 litters, there were no surviving *Tie2-tTA;TRE-int3* pups, suggesting that *int3* expression in endothelial cells leads to embryonic lethality.
